# Supplementary material for: DC-SIGN of Largemouth Bass (Micropterus salmoides) Mediates Immune Functions against Aeromonas hydrophila through Collaboration with the TLR Signaling Pathway
Source: MDPI journal article supplement (doi:10.3390/ijms25095013), 2024-05-03
Supplement: s1 [file s1]

The RNAi effects of different siRNAs for interference of MsDC-SIGN with different dose (Figure S1).

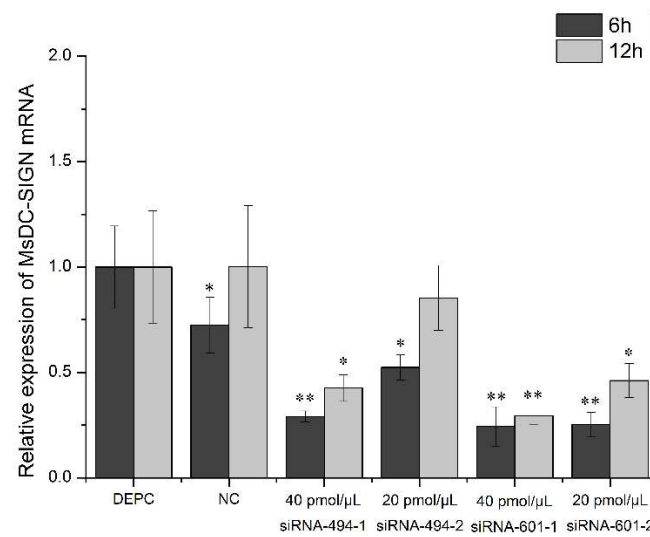

Figure S1. Expression level of MsDC-SIGN gene after RNA interference at 6 h and 12 h. \* indicates that there is a significant difference between the two groups of data in the experimental group and the control group ( $P < 0.05$ ); \*\* indicates that the difference between the two groups of data in the experimental group and the control group is extremely significant ( $P < 0.01$ ).
